# Supplementary material for: GREB1L overexpression is associated with good clinical outcomes in breast cancer
Source: Springer Nature journal article supplement (doi:10.1186/s40001-023-01483-y), 2023-11-14

A

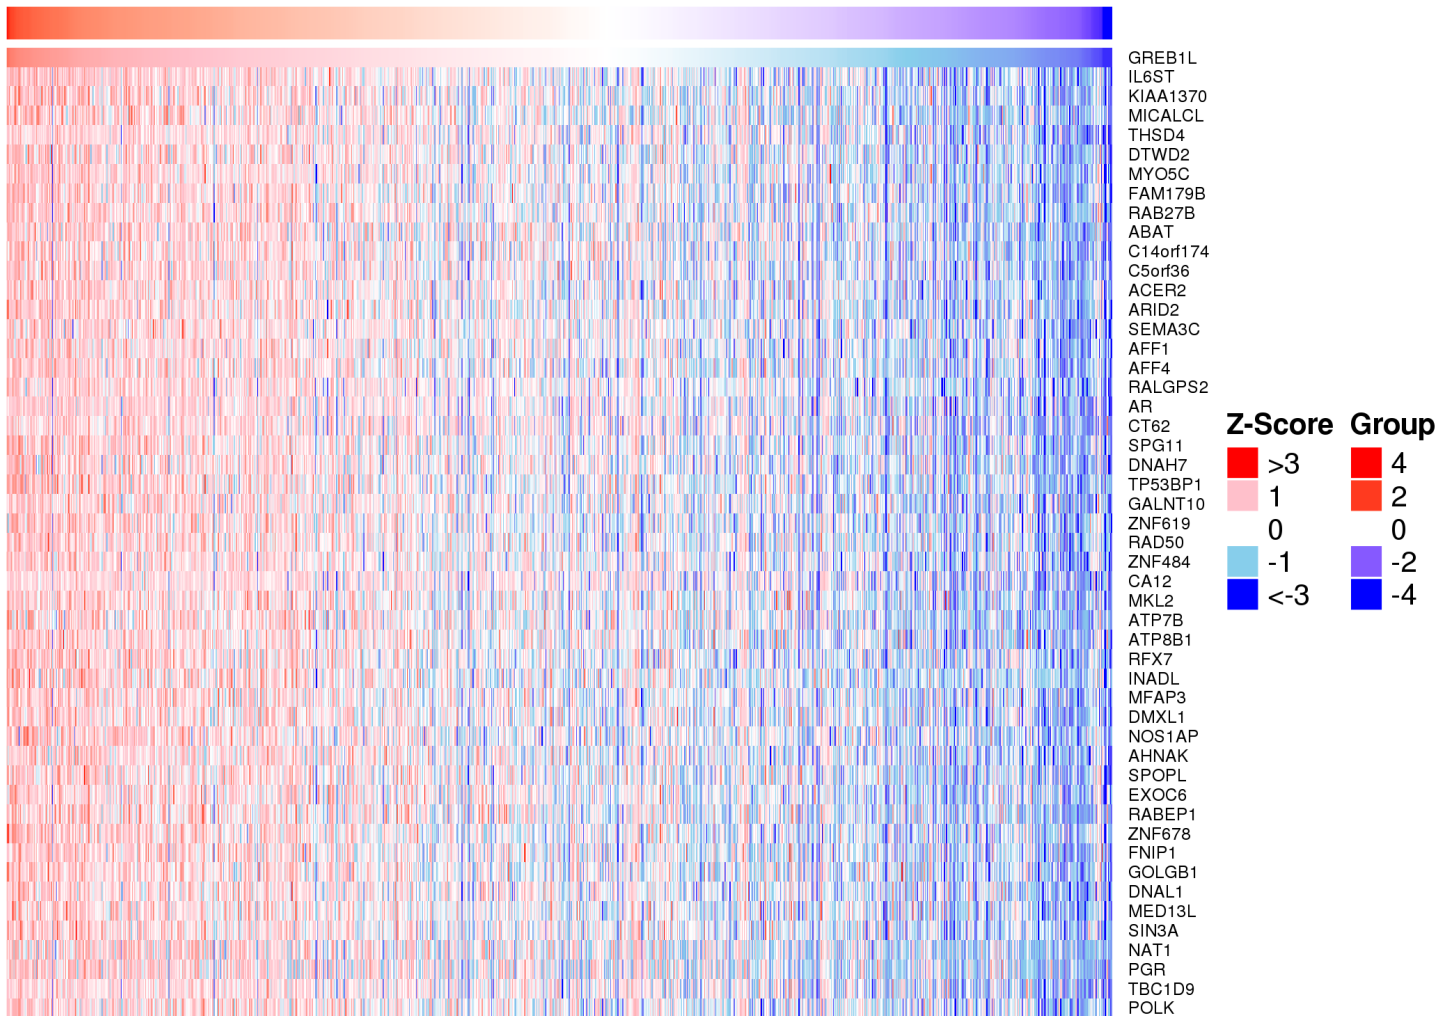

B

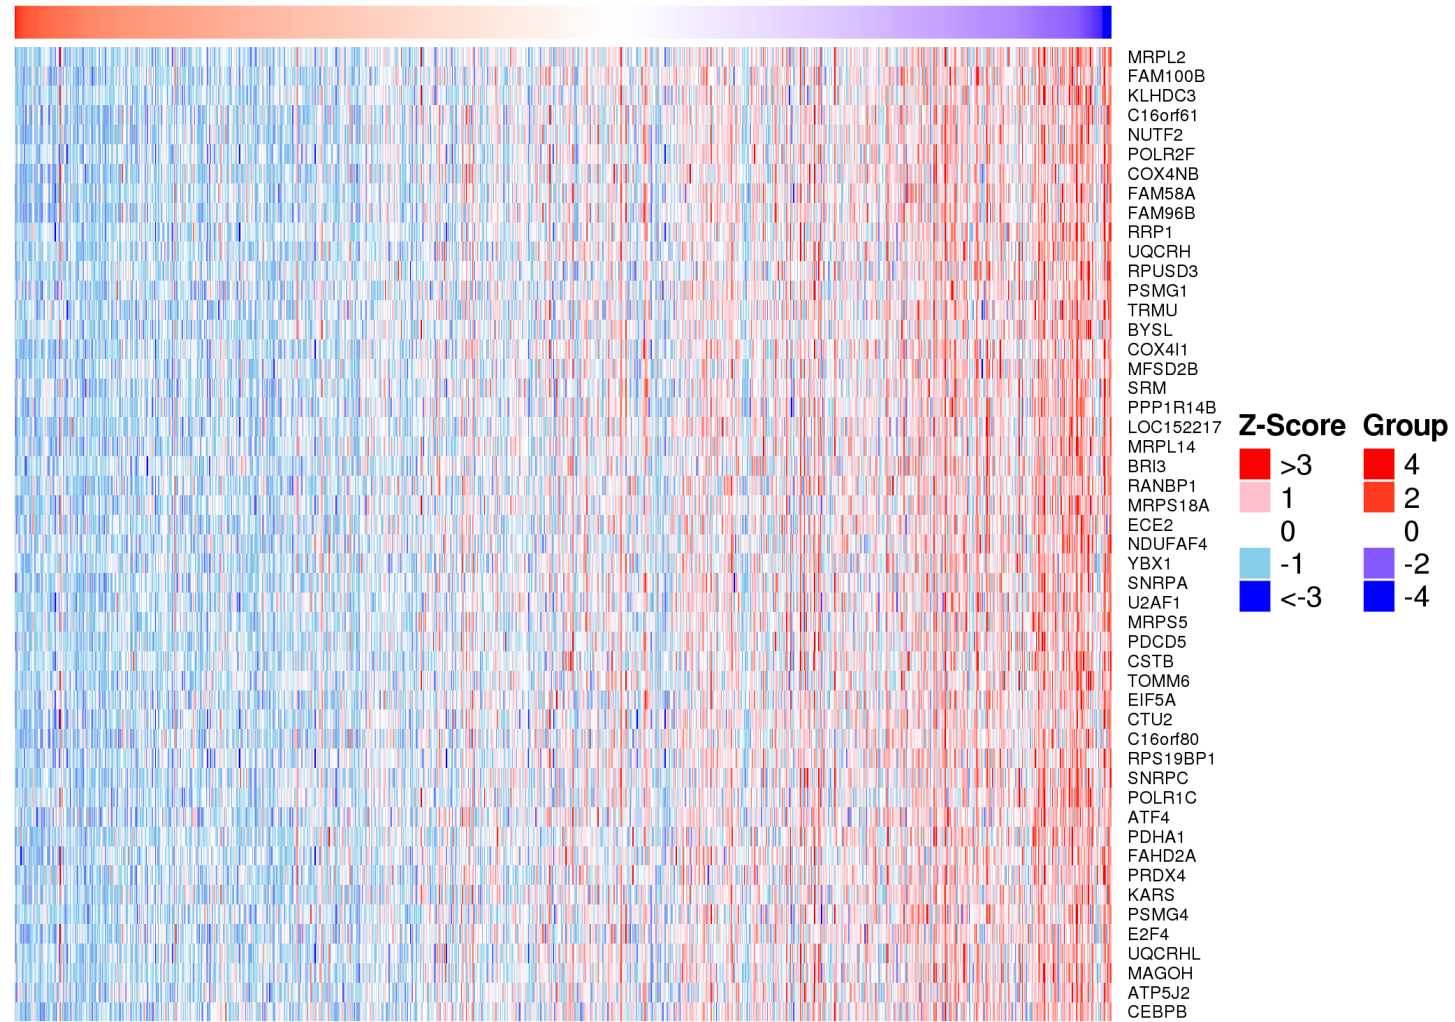

Supplement: MOESM2 [file 26302626]
